# Supplementary material for: Understanding nanocellulose chirality and structure–properties relationship at the single fibril level
Source: PubMed Central journal article supplement (PMC4491835; doi:10.1038/ncomms8564), 2015-06-25
Supplement: ncomms8564-s1.pdf [file ncomms8564-s1.pdf]

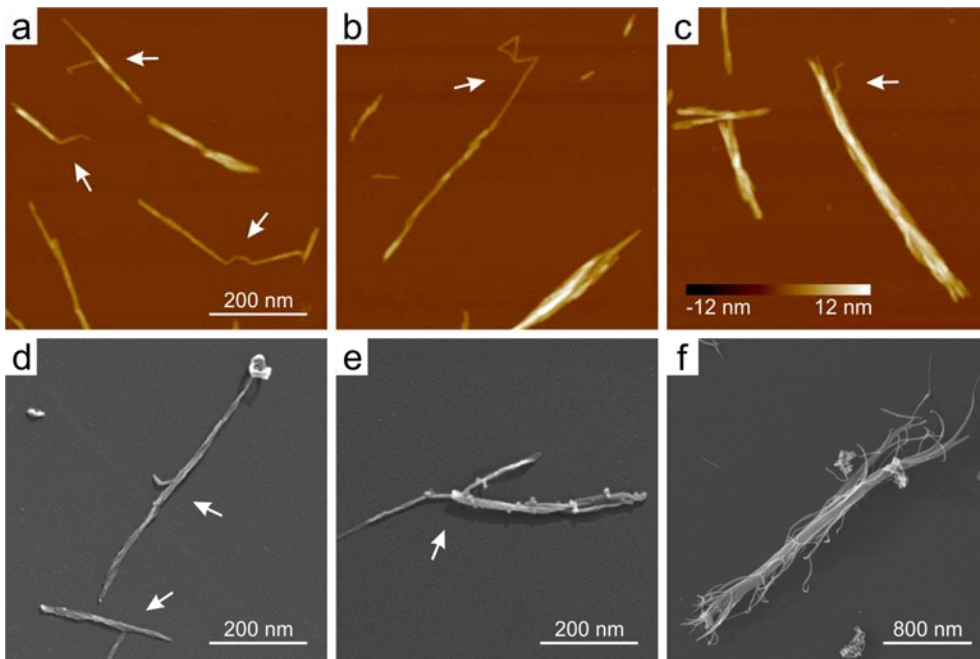

**Supplementary Figure 1.** Cellulose nanofibrils with kinks and/or splitting events that are pointed by white arrows in the images of the W-CNC, indicating that the hydrolysis was not fully completed. The images were acquired *via* (a-c) AFM and (d-f) Cryo-SEM. The scale bar in panel a and the color bar in panel c apply to all AFM images a-c.

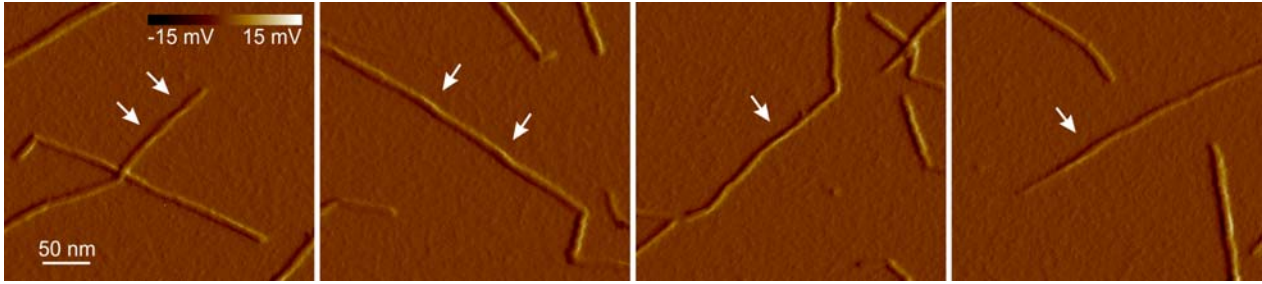

**Supplementary Figure 2.** Image data from the amplitude channel of AFM scanning showing W-CNF with observable right-handed twisting. The scale and color bars in the left panel apply to all AFM amplitude images.

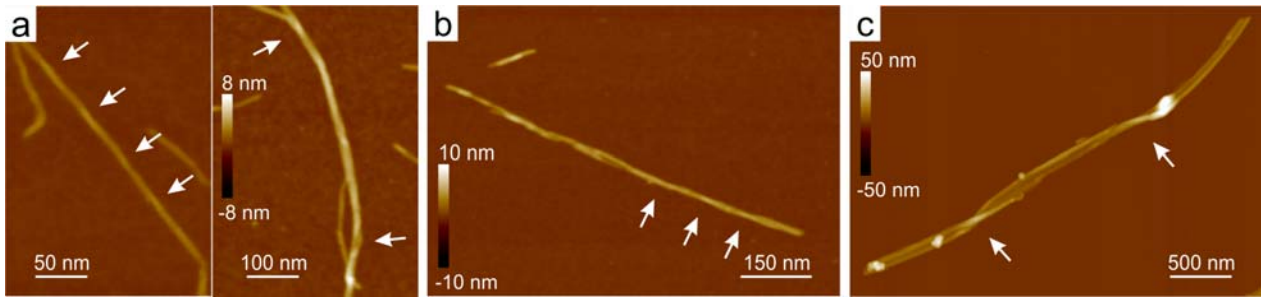

**Supplementary Figure 3.** Corresponding AFM height maps for the panels **a**, **d**, **g** of the Figure 2 in the main text, with the white arrows reproduced in the same positions.

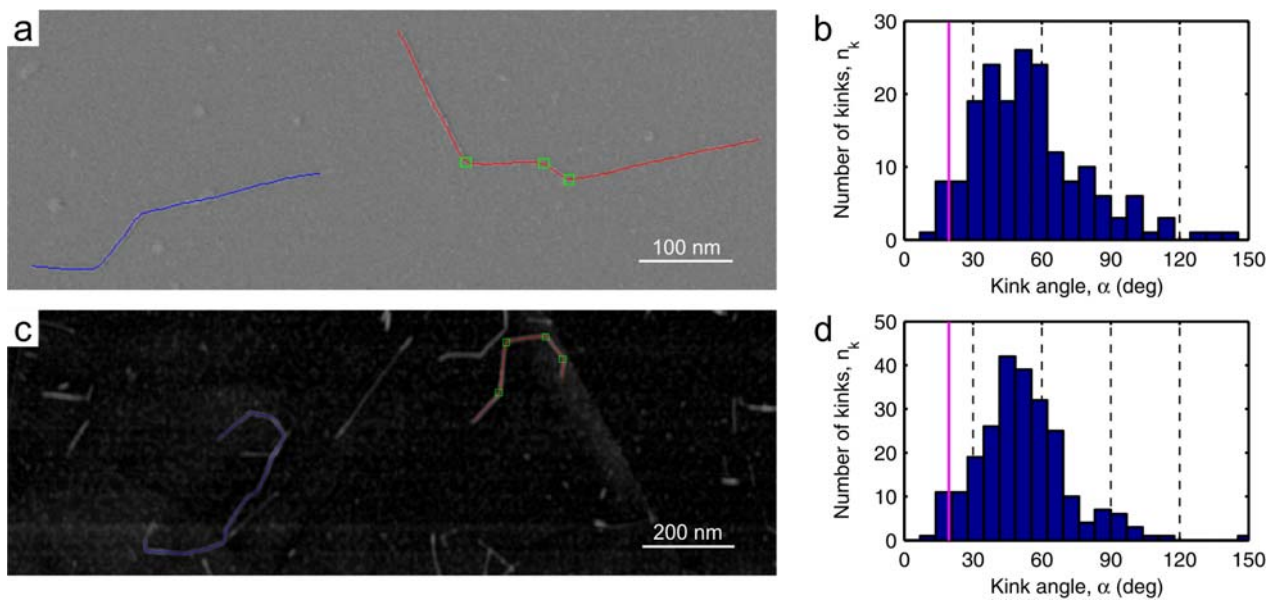

**Supplementary Figure 4.** An example of (a) Cryo-SEM image and (c) AFM on graphite with traced W-CNF and manually detected kinks. The corresponding kink angle distributions (b and d) for the corresponding samples (a and c).

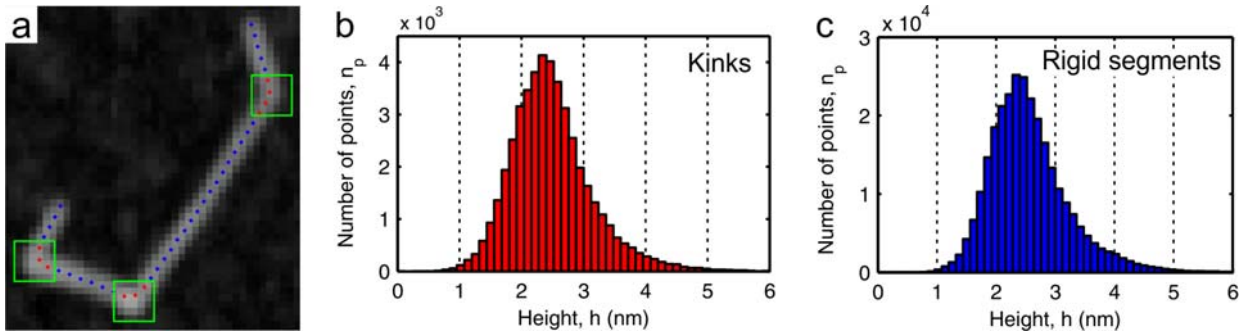

**Supplementary Figure 5.** A comparison between height distributions of contour points which are located in the vicinities of kinks and along stiff segments in W-CNF. **(a)** Example of the fibril from W-CNF and a corresponding contour with mask elements (green boxes), defining the kink areas. **(b)** The height distribution of all points inside regions of mask elements (red points). **(c)** The height distribution of all points outside regions of mask elements (blue points). Overall, these distributions do not differ from each other.

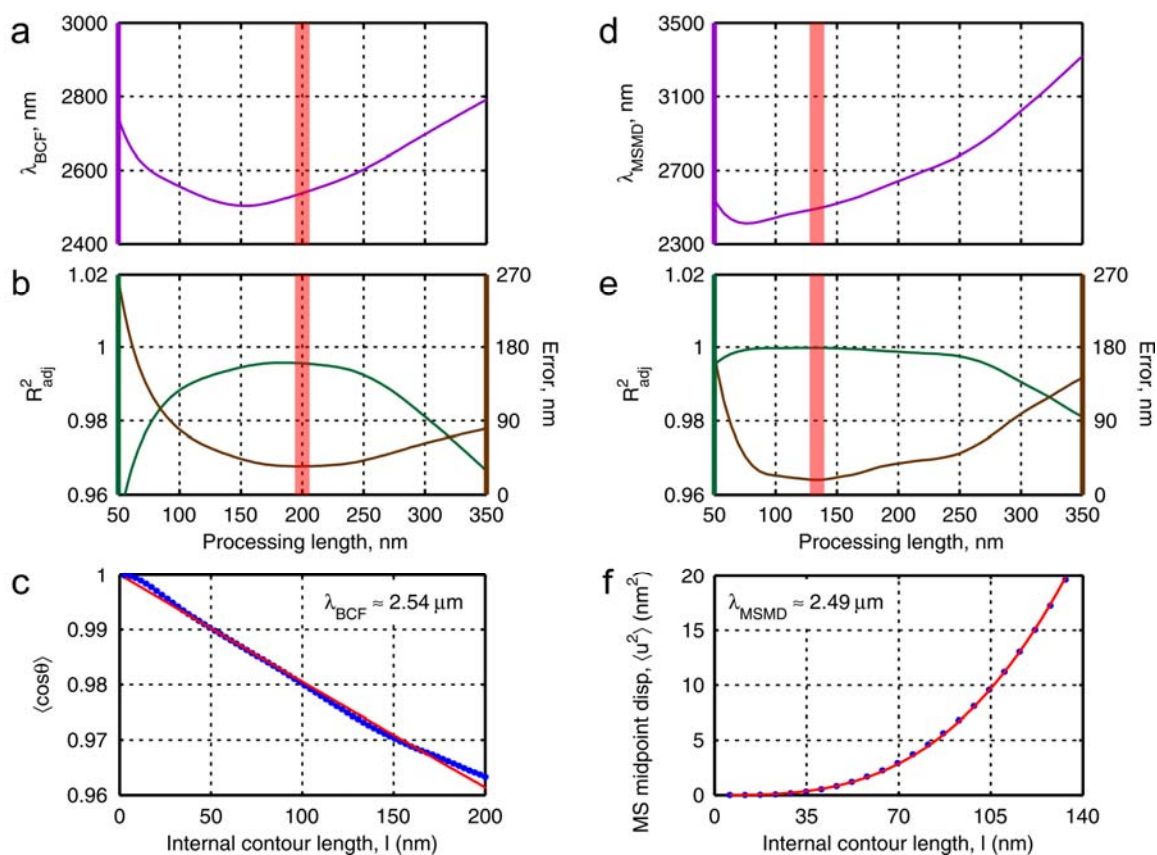

**Supplementary Figure 6.** The persistence length estimation of the rigid segments derived from W-CNF tracked contours *via* **(a-c)** the bond correlation function method, and **(d-f)** the mean-squared midpoint displacement method. **(a, d)** The persistence length values ( $\lambda_{\text{BCF}}$  and  $\lambda_{\text{MSMD}}$  respectively) plotted *versus* the processing length. **(b, e)** Adjusted coefficient of determination (goodness of fit)  $R_{\text{adj}}^2$  and fitting error *versus* the processing length. Horizontal axes from the panels **b** and **e** correspond also to the panels **a** and **d** respectively. The red vertical lines correspond to the processing length 200 nm for the bond correlation function and 135 nm for the mean-squared midpoint displacement methods, at which the  $R_{\text{adj}}^2$  is maximal and the fitting error is minimal. **(c, f)** The best fits for the bond correlation function and the mean-squared midpoint displacement respectively *versus* the internal contour length, truncated at the optimal processing length. The resulting persistence lengths are  $\lambda_{\text{BCF}} = 2.54 \mu\text{m}$  and  $\lambda_{\text{MSMD}} = 2.49 \mu\text{m}$ .



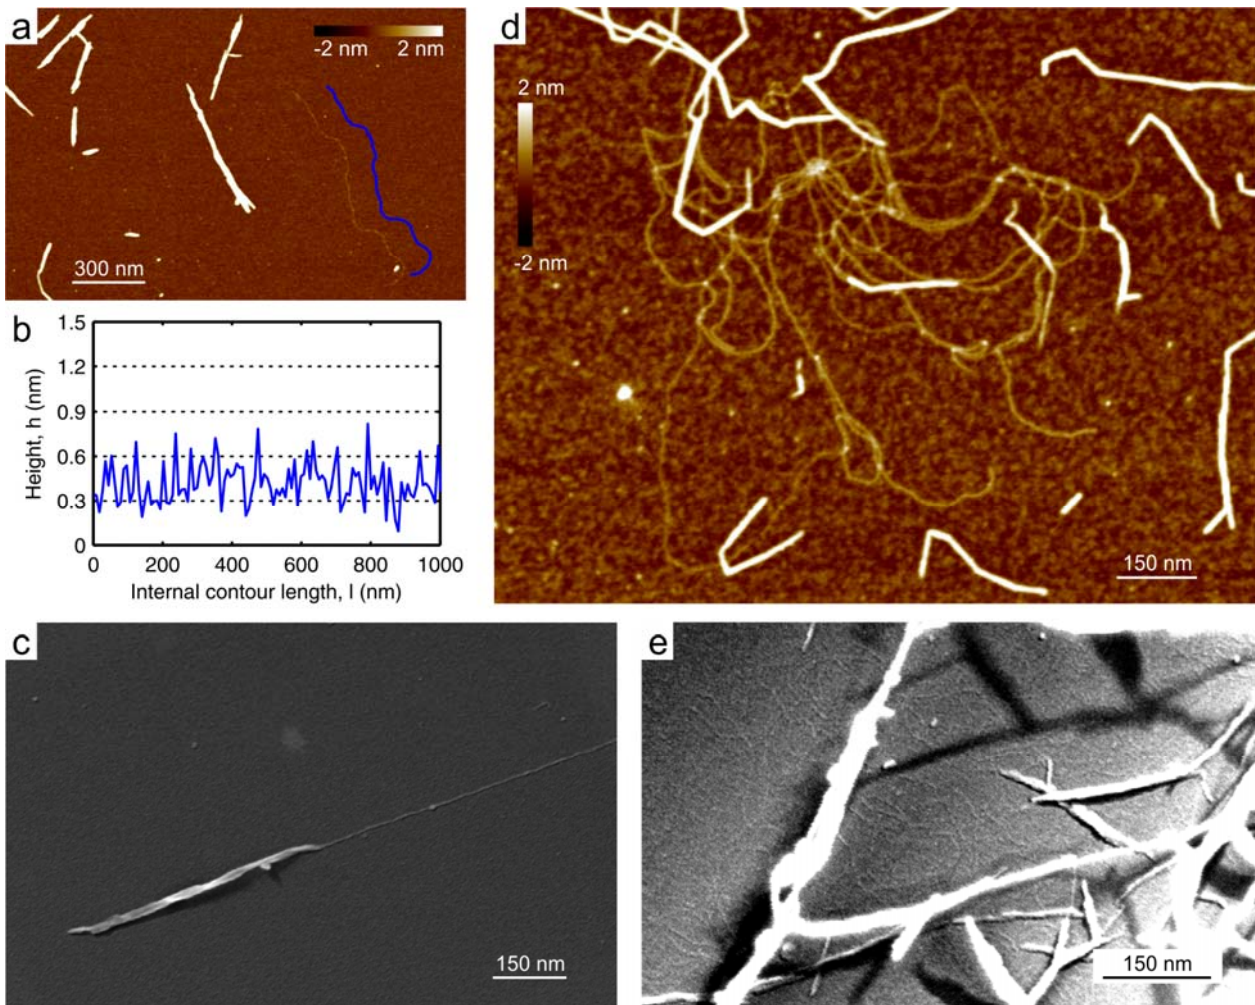

**Supplementary Figure 7.** (a) Observation of a single cellulose polymer chain in AFM image of the W-CNC. The blue line is a representation of the cellulose chain tracked contour, which is shifted for better visualization. (b) Height profile along the contour from the panel a with the average height value  $\langle h \rangle \cong 0.45$  nm. (c) Observation of, possibly, a single cellulose polymer chain in Cryo-SEM image of the W-CNC. (d) AFM image of W-CNF, depicting single and 2×2 cellulose polymer chains forming a remarkable network with a well-defined entanglement center. (e) Cryo-SEM image with a high contrast of W-CNC, showing similar network in the background.

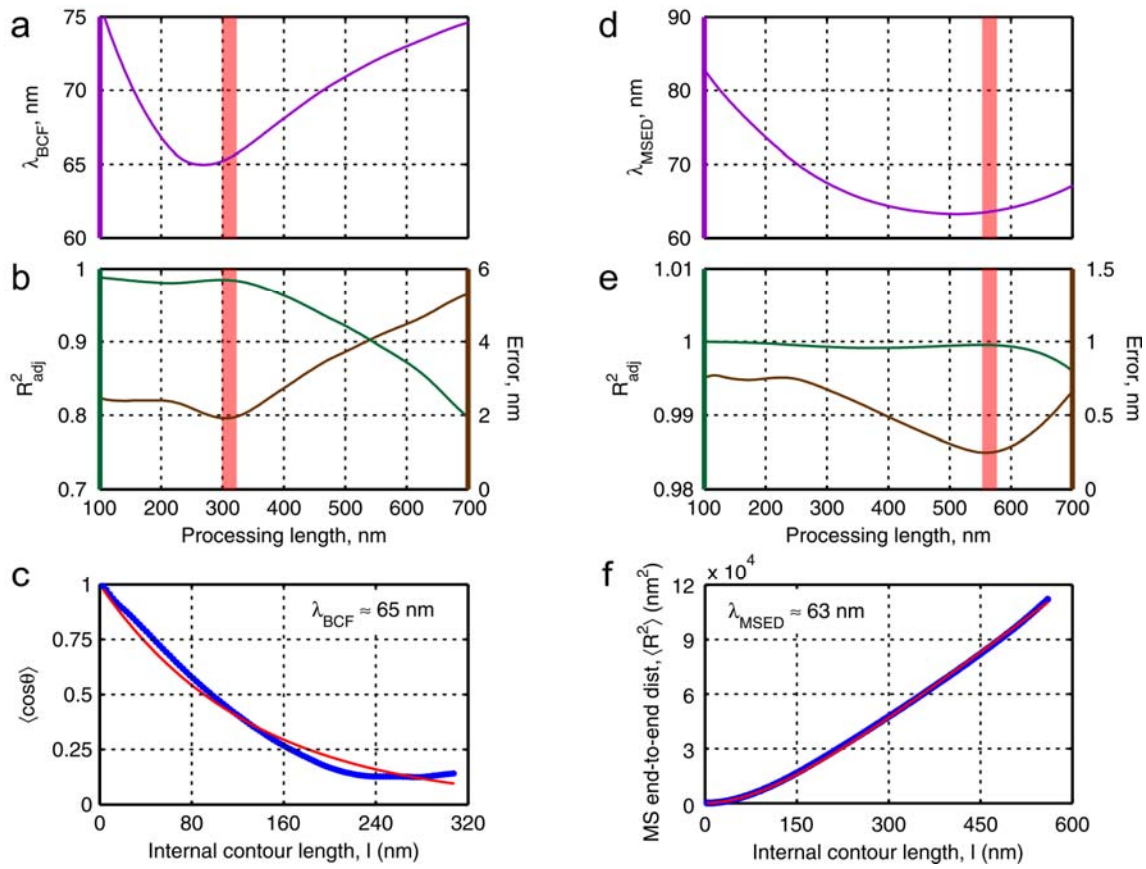

**Supplementary Figure 8.** The persistence length estimation of single cellulose polymer chain contours *via* (a-c) the bond correlation function method and (d-f) the mean-squared end-to-end distance method. (a, d) The persistence length values ( $\lambda_{BCF}$  and  $\lambda_{MSED}$  respectively) plotted *versus* the processing length. (b, e) Adjusted coefficient of determination (goodness of fit)  $R_{adj}^2$  and fitting error *versus* the processing length. Horizontal axes from the panels b and e correspond also to the panels a and d respectively. The red vertical lines correspond to the processing length 307 nm for the bond correlation function and 560 nm for the mean-squared end-to-end distance methods, at which the  $R_{adj}^2$  is maximal and the fitting error is minimal. (c, f) The best fits for the bond correlation function and the mean-squared end-to-end distance respectively *versus* the internal contour length, truncated at the optimal processing length. The resulting persistence lengths are  $\lambda_{BCF} = 65$  nm and  $\lambda_{MSED} = 63$  nm.
